# Supplementary material for: Interaction of aliphatic amino acids with zwitterionic and charged lipid membranes: hydration and dehydration phenomena
Source: Royal Society of Chemistry journal article supplement (doi:10.1039/c9cp06188f), 2020-01-01
Supplement: c9cp06188f1.pdf [file c9cp06188f1.pdf]

# **Interaction of aliphatic amino acids with zwitterionic and charged lipid membranes: hydration and dehydration phenomena**

**Nishu Kanwa, Soumya Kanti De, Avijit Maity and Anjan  
Chakraborty\***

Discipline of Chemistry  
Indian Institute of Technology Indore, Indore, Madhya Pradesh,  
India, 453552.

Authors for correspondence

Email: [anjanc@iiti.ac.in](mailto:anjanc@iiti.ac.in)

## Supporting Information

**Figure S1: a) Normalized emission spectra of PRODAN in aqueous medium and in different lipid mediums (DPPC, DMPC and DOPC lipid bilayers) showing a blue shift in PRODAN–lipid bilayer systems as compared to PRODAN in aqueous solution; (b) representative time-resolved decay of PRODAN in different lipid bilayers collected at 440 nm.**

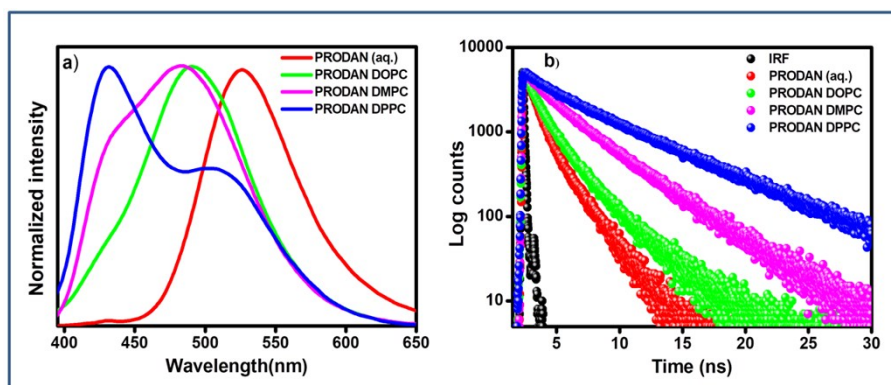

**Figure S2: Steady state and corresponding time-resolved lifetime decay curves collected at 440 nm for DMPC-PRODAN upon interaction with L-aspartic acid (a-b) and L-glutamic acid (c-d).**

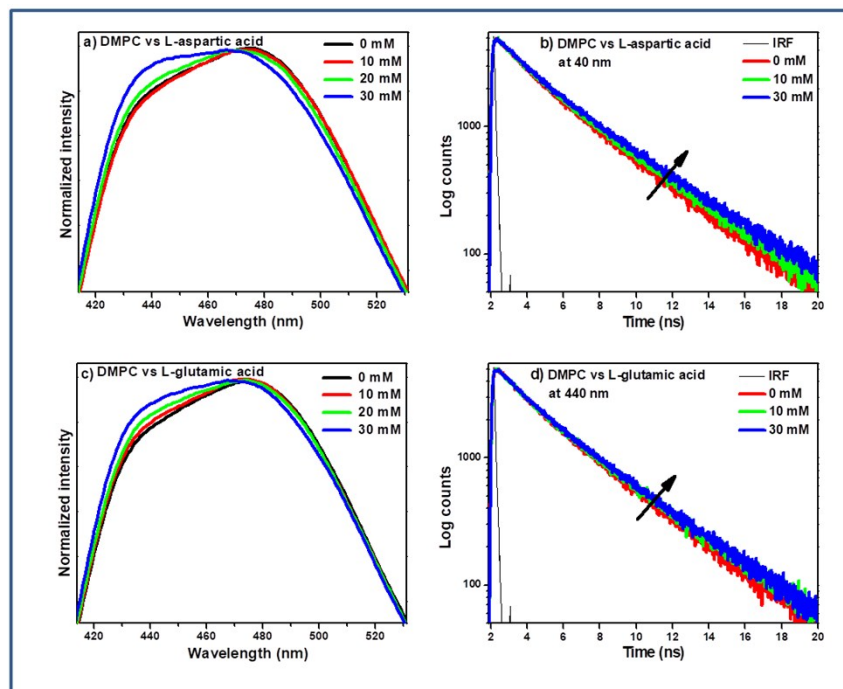

**Figure S3: Steady state fluorescence spectra for interaction of negatively charged amino acids with positively charged lipid bilayer DMPC: DMTAP.**

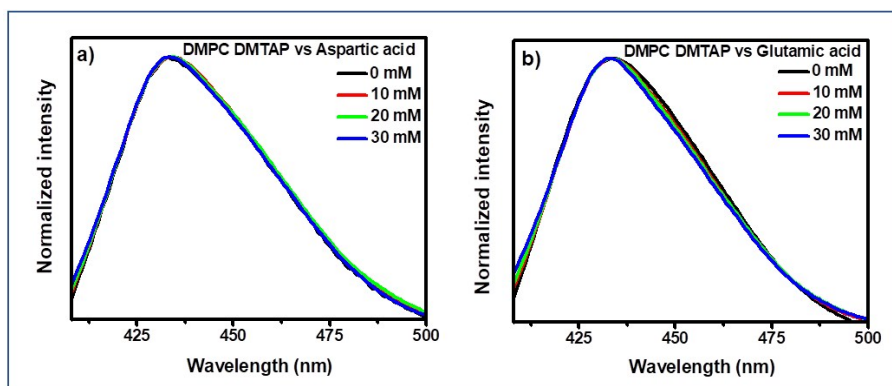

**Figure S4: Plots of temperature-induced variation in the steady-state fluorescence spectra of PRODAN in a) negatively charged DMPC: DMPG bilayer, b) upon interaction with arginine, c) b) upon interaction with aspartic acid, d) area fraction ( $A_{435 \text{ nm}}/A_{500 \text{ nm}}$ ) v/s temperature plot for DMPC: DMPG in the presence and absence of amino acids (from 10 °C to 40 °C) and e) first derivative of area (dA/dT) v/s temperature plot.**

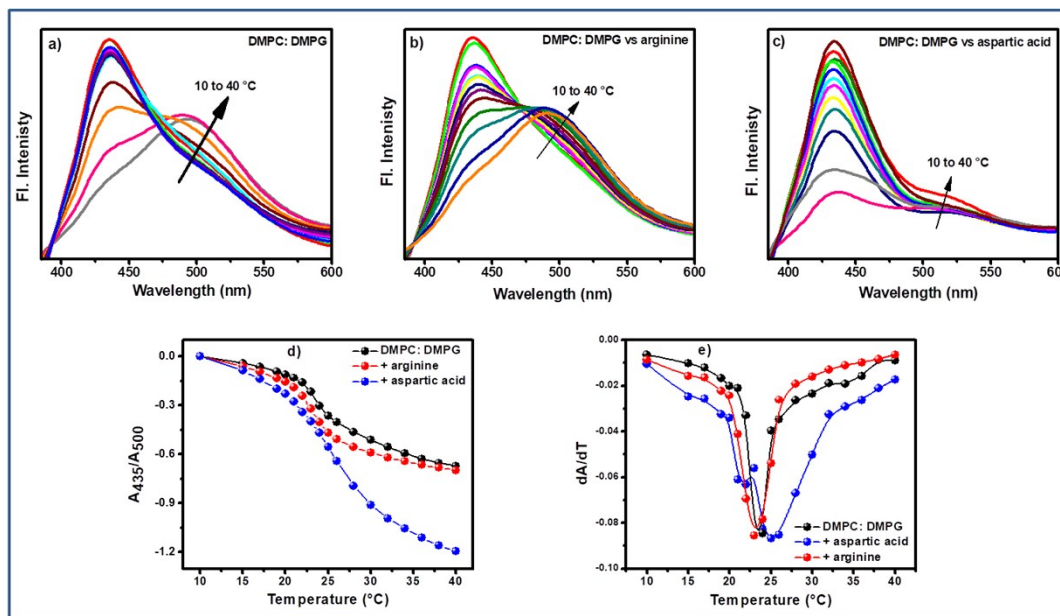

**Figure S5: Steady state normalized fluorescence emission spectra (a), area fraction plot (b), time-resolved lifetime decay curves collected at 440 nm (c), and anisotropy plots at 440 nm (d) for DMPC-DMPG (prepared in HEPES buffer, pH = 7.0) upon interaction with L-aspartic acid.**

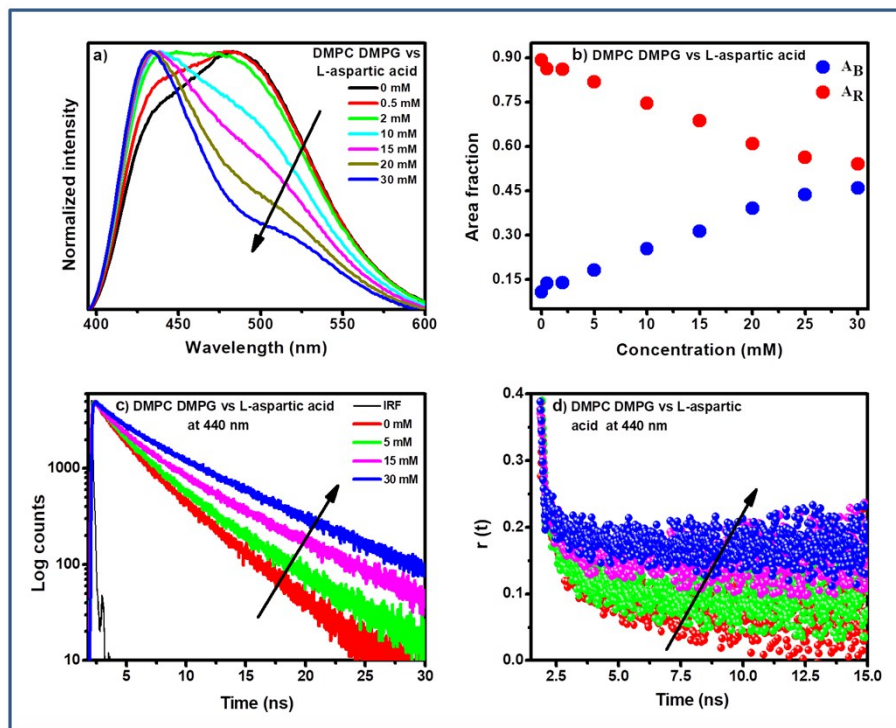

**Figure S6: Steady state normalized fluorescence emission spectra (a), area fraction plot (b), time-resolved lifetime decay curves collected at 440 nm (c), and anisotropy plots at 440 nm (d) for DMPC-DMPG (prepared in HEPES buffer, pH = 7.0) upon interaction with L-glutamic acid.**

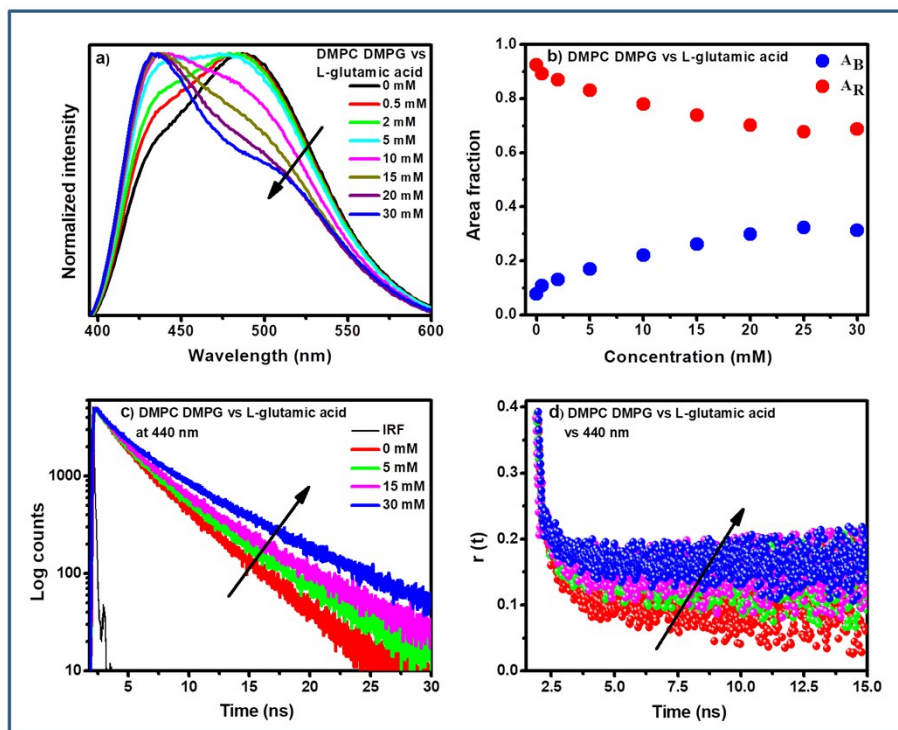

**Figure S7: Steady state and corresponding time-resolved lifetime decay curves collected at 440 nm for DMPC-PRODAN upon interaction with L-lysine (a-b) and L-arginine (c-d).**

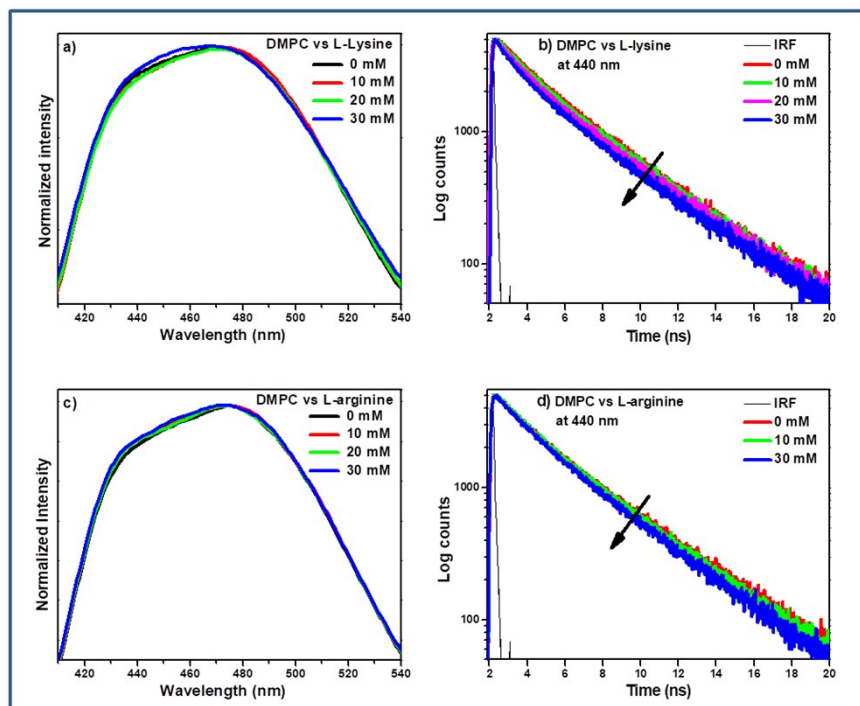

**Figure S8: Steady state (a-b) and time resolved lifetime decay curves collected at 440 nm of L-lysine and L-arginine with DMPC: DMTAP.**

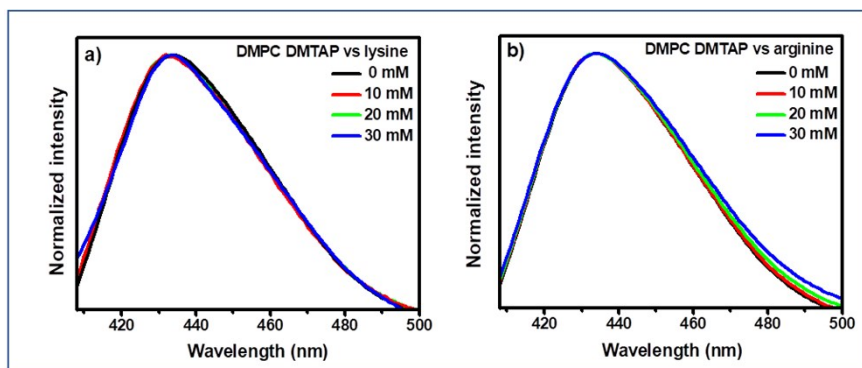

**Figure S9: Steady state, corresponding area fraction plot (inset) and time-resolved lifetime decay curves collected at 440 nm for DMPC-DMPG upon interaction with L-lysine (a-b) and L-arginine (c-d). Upward arrows in emission spectra indicate an initial increase in peak at 440 nm, whereas downward arrows indicate a gradual decrease in the peak indicating fluidization of the bilayer.**

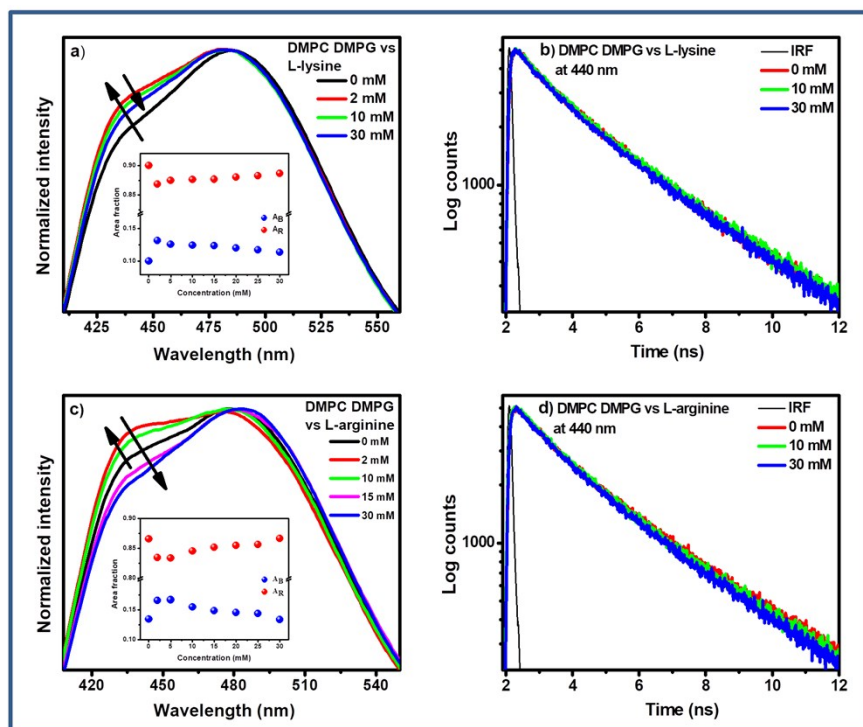

**Figure S10: Comparison of emission curves for all maxima for L-amino acids with DMPC-PRODAN solutions prepared in Milli-Q water.**

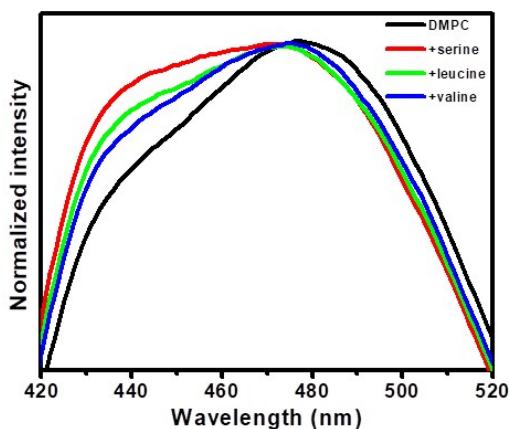



**Figure S11: Steady state normalized fluorescence spectra (a-c) and corresponding area fraction plots for DMPC-PRODAN prepared in HEPES buffer (pH = 7.0) upon interaction with amino acids (d-f).**

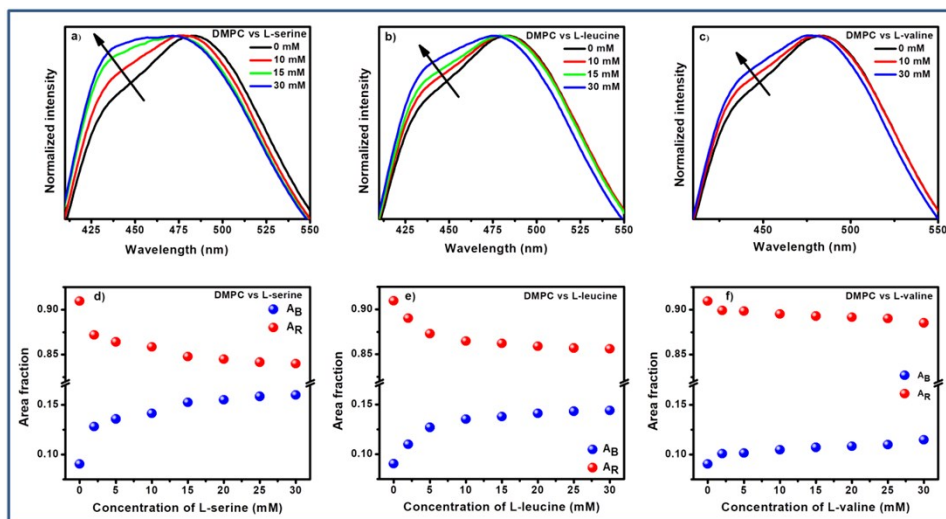

**Figure S12: Binding of amino acids using confocal scanning laser microscopy (CLSM). Confocal, bright field and merged images for DMPC vesicles (a-c), DMPC + L-serine (d-f), Bars indicate 2  $\mu$ m size.**

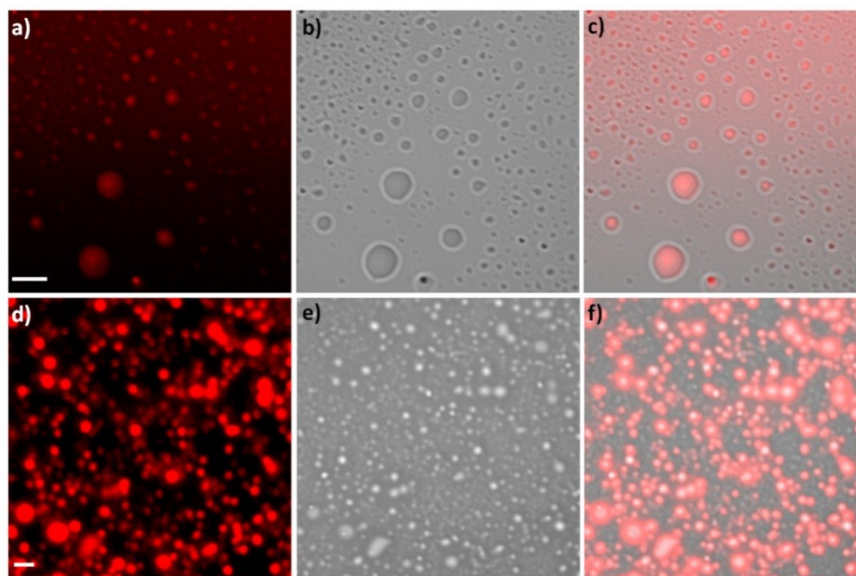

**Figure S13: Steady state fluorescence emission and time-resolved lifetime decay curves collected at 440 nm (inset) for DMPC-PRODAN upon interaction with D-amino acids.**

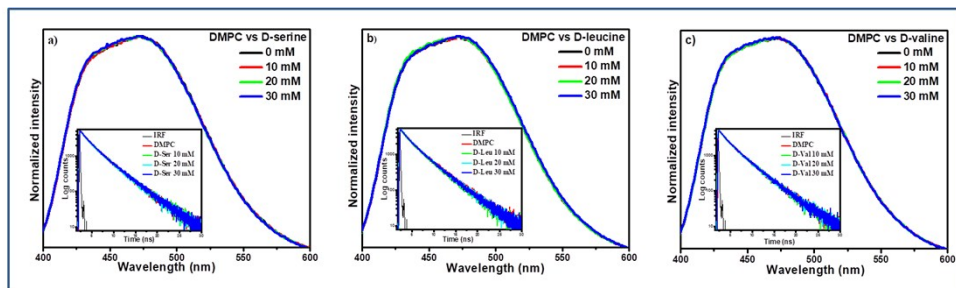

**Figure S14: Steady state fluorescence emission (a-c), area fraction plots (d-f) and time-resolved lifetime decay curves collected at 440 nm (g-i) for DPPC-PRODAN upon interaction with L-amino acids.**

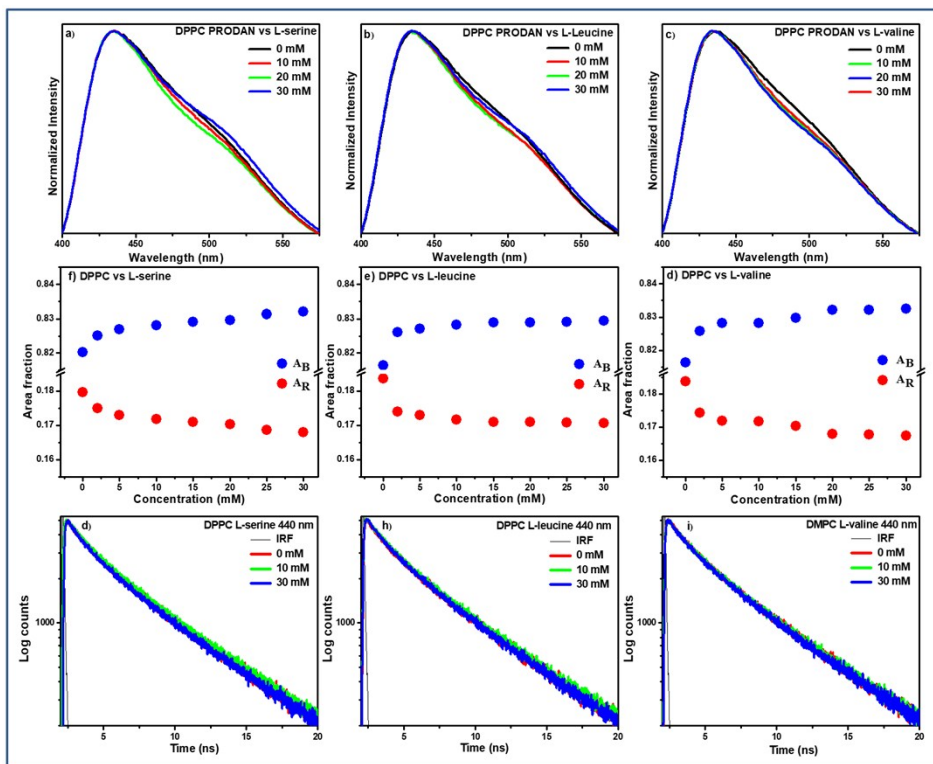

**Figure S15: Steady state (a-c) and time resolved lifetime decay curves collected at 440 nm (d-f) of L-amino acids with DOPC.**

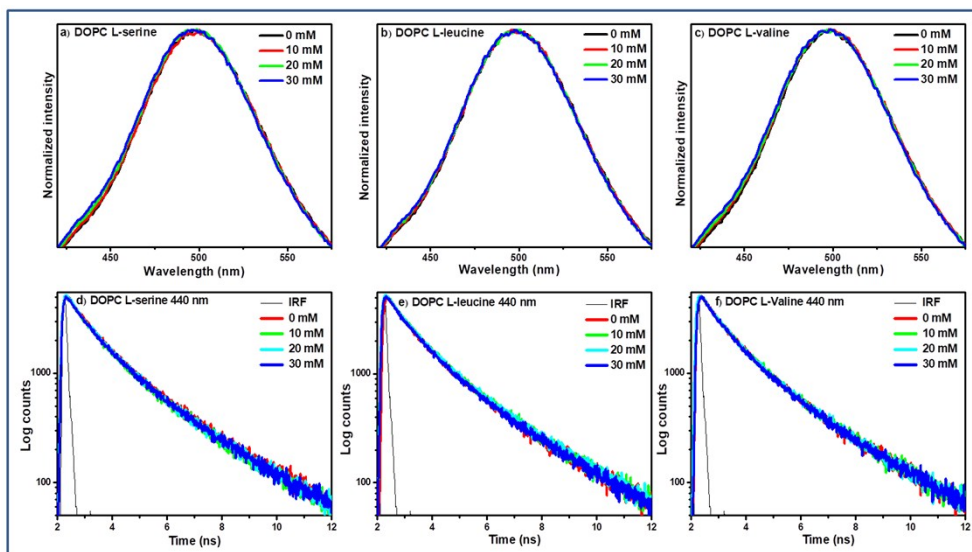

**Table S1: Lifetime components, normalized amplitudes of lifetime components and average lifetime of PRODAN in different lipid mediums collected at 440 nm at 25 °C.<sup>#</sup>**

| Sample      | $\tau_1$ (ns) | $\tau_2$ (ns) | $a_1$ | $a_2$ | $\langle\tau_{avg}\rangle$ (ns) | $\chi^2$ |
|-------------|---------------|---------------|-------|-------|---------------------------------|----------|
| PRODAN DOPC | 0.76          | 2.37          | 0.61  | 0.39  | 1.40                            | 1.16     |
| PRODAN DMPC | 1.49          | 4.33          | 0.38  | 0.62  | 3.25                            | 1.11     |
| PRODAN DPPC | 1.36          | 6.39          | 0.28  | 0.72  | 5.00                            | 1.07     |

<sup>#</sup>Experimental error is within  $\pm 10\%$ .

**Table S2: Lifetime components, normalized amplitudes of lifetime components, and average lifetime of PRODAN for DMPC: DMPC vesicles (prepared in Milli-Q water) upon interaction with L-aspartic acid and L-glutamic acid collected at 440 nm and 500 nm at 25 °C.<sup>#</sup>**

| <b>DMPC: DMPG vs L-aspartic acid @440 nm, 25 °C</b> |                                 |                                 |                                 |                         |                         |                         |                                                       |                            |
|-----------------------------------------------------|---------------------------------|---------------------------------|---------------------------------|-------------------------|-------------------------|-------------------------|-------------------------------------------------------|----------------------------|
| <b>Sample</b>                                       | <b><math>\tau_1</math> (ns)</b> | <b><math>\tau_2</math> (ns)</b> | <b><math>\tau_3</math> (ns)</b> | <b><math>a_1</math></b> | <b><math>a_2</math></b> | <b><math>a_3</math></b> | <b><math>\langle\tau_{avg}\rangle</math><br/>(ns)</b> | <b><math>\chi^2</math></b> |
| 0 mM                                                | 1.49                            | 5.23                            | 0.07                            | 0.21                    | 0.21                    | 0.58                    | 1.44                                                  | 1.17                       |
| 10 mM                                               | 1.32                            | 6.12                            | 0.02                            | 0.04                    | 0.04                    | 0.93                    | 0.29                                                  | 1.10                       |
| 20 mM                                               | 1.62                            | 7.08                            | 0.02                            | 0.03                    | 0.05                    | 0.93                    | 0.39                                                  | 1.03                       |
| 30 mM                                               | 2.59                            | 7.78                            | 0.01                            | 0.01                    | 0.04                    | 0.95                    | 0.36                                                  | 1.06                       |
| <b>DMPC: DMPG vs L-glutamic acid @440 nm, 25 °C</b> |                                 |                                 |                                 |                         |                         |                         |                                                       |                            |
| 0 mM                                                | 1.49                            | 5.23                            | 0.07                            | 0.21                    | 0.21                    | 0.58                    | 1.44                                                  | 1.17                       |
| 10 mM                                               | 1.30                            | 5.91                            | 0.03                            | 0.07                    | 0.07                    | 0.86                    | 0.52                                                  | 1.13                       |
| 20 mM                                               | 1.54                            | 6.67                            | 0.03                            | 0.06                    | 0.08                    | 0.86                    | 0.63                                                  | 1.09                       |
| 30 mM                                               | 2.03                            | 7.50                            | 0.02                            | 0.03                    | 0.11                    | 0.85                    | 0.92                                                  | 1.02                       |

<sup>#</sup>Experimental error is within  $\pm 10\%$ .

**Table S3: Lifetime components, normalized amplitudes of lifetime components, and average lifetime of PRODAN for DMPC: DMPC vesicles (prepared in HEPES buffer, pH =7.0) upon interaction with L-aspartic acid and L-glutamic acid collected at 440 nm and 500 nm at 25 °C.<sup>#</sup>**

| <b>DMPC: DMPG vs L-aspartic acid @440 nm, 25 °C</b> |                                 |                                 |                         |                         |                                                   |                            |
|-----------------------------------------------------|---------------------------------|---------------------------------|-------------------------|-------------------------|---------------------------------------------------|----------------------------|
| <b>Sample</b>                                       | <b><math>\tau_1</math> (ns)</b> | <b><math>\tau_2</math> (ns)</b> | <b><math>a_1</math></b> | <b><math>a_2</math></b> | <b><math>\langle\tau_{avg}\rangle</math> (ns)</b> | <b><math>\chi^2</math></b> |
| 0 mM                                                | 1.60                            | 4.28                            | 0.53                    | 0.47                    | 2.85                                              | 1.15                       |
| 5 mM                                                | 1.84                            | 5.09                            | 0.56                    | 0.44                    | 3.26                                              | 1.21                       |
| 15 mM                                               | 2.00                            | 6.41                            | 0.51                    | 0.49                    | 4.17                                              | 1.07                       |
| 30 mM                                               | 2.30                            | 7.61                            | 0.40                    | 0.60                    | 5.50                                              | 1.10                       |
| <b>DMPC: DMPG vs L-glutamic acid @440 nm, 25 °C</b> |                                 |                                 |                         |                         |                                                   |                            |
| 0 mM                                                | 1.60                            | 4.28                            | 0.53                    | 0.47                    | 2.85                                              | 1.15                       |
| 5 mM                                                | 1.83                            | 5.08                            | 0.57                    | 0.43                    | 3.21                                              | 1.16                       |
| 15 mM                                               | 1.88                            | 5.58                            | 0.57                    | 0.43                    | 3.46                                              | 1.11                       |
| 30 mM                                               | 1.88                            | 6.49                            | 0.50                    | 0.50                    | 4.18                                              | 1.11                       |

<sup>#</sup>Experimental error is within  $\pm 10\%$ .
